# Supplementary material for: The adsorption and activation of NO on silver clusters with sizes up to one nanometer: interactions dominated by electron transfer from silver to NO
Source: Royal Society of Chemistry journal article supplement (doi:10.1039/c6cp01156j), 2016-01-01

Figure S1

Mass spectra showing reaction products of  $\text{Ag}_n^+$  with NO flow of 0.01 sccm at (a) 120 K and (a') 150 K, and  $\text{Ag}_n^-$  with NO flow of 0.01 sccm at (b) 120 K and (b') 150 K

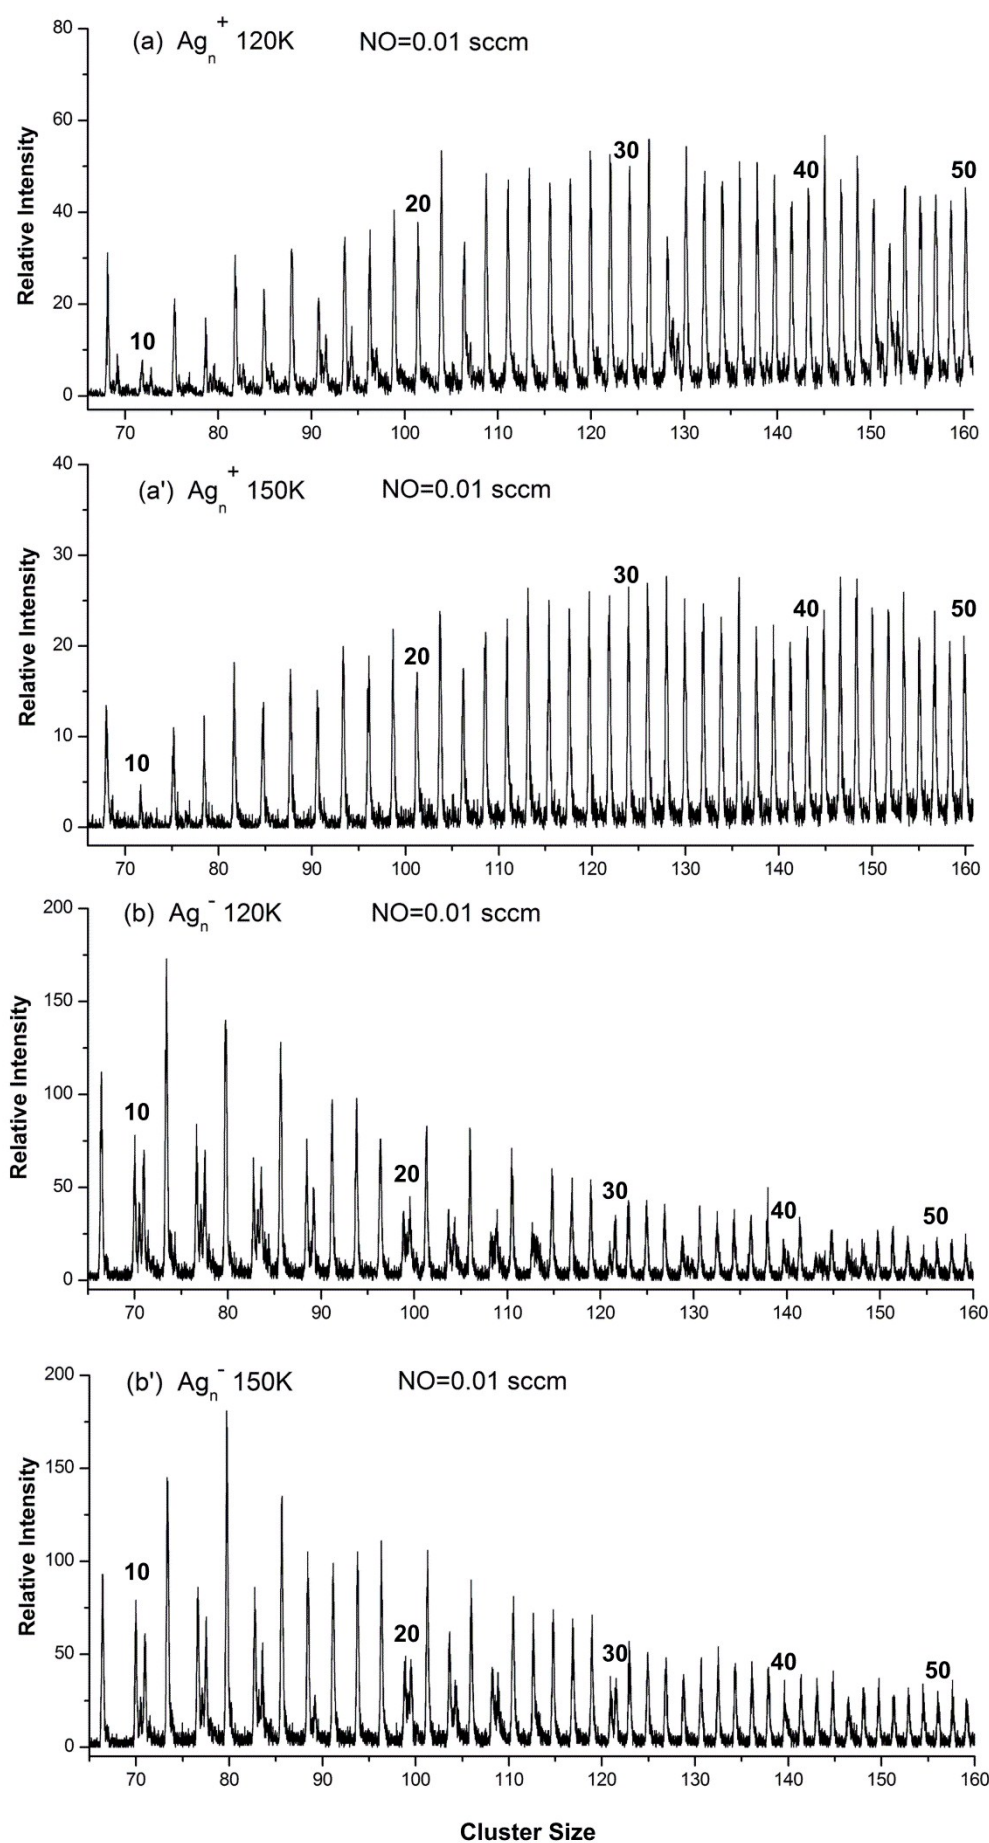

Supplement: c6cp01156j1.pdf [file c6cp01156j1.pdf]
